# Supplementary material
Source: publisher figshare collection journal article supplement (https://acs.figshare.com/ndownloader/files/20353122)
Supplement: Supplementary file 1 [file 20353122]

# **Dietary supplementation of n-3 long chain LCPUFAs prevents salmonellosis in a murine model**

**Running title:** n-3 LCPUFAs prevent *Salmonella* infection

Junsheng Liu<sup>a,b,c,d,\*</sup>, Hongxuan Huang<sup>b,c,\*</sup>, Qin Yang<sup>b,c,e</sup>, Jianxin Zhao<sup>b,c,d</sup>, Hao Zhang<sup>b,c,d</sup>, Wei Chen<sup>b,c,d,f</sup>, Xichun Peng<sup>a#</sup>, Zhennan Gu<sup>b,c#</sup>

<sup>a</sup> Department of Food Science and Engineering, Jinan University, Guangzhou, Guangdong 510632, P. R. China

<sup>b</sup> State Key Laboratory of Food Science and Technology, Jiangnan University, Wuxi, Jiangsu 214122, P. R. China

<sup>c</sup> School of Food Science and Technology, Jiangnan University, Wuxi, Jiangsu 214122, P. R. China

<sup>d</sup> National Engineering Research Center for Functional Food, Jiangnan University, Wuxi, Jiangsu 214122, P. R. China

<sup>e</sup> Wuxi School of Medicine, Jiangnan University, Wuxi, Jiangsu 214122, P. R. China

<sup>f</sup> Beijing Innovation Centre of Food Nutrition and Human Health, Beijing Technology and Business University (BTBU), Beijing 100048, P. R. China

\* These authors contributed equally to this study

# **Corresponding author:** Dr. Xichun Peng, [tpxchun@jnu.edu.cn](mailto:tpxchun@jnu.edu.cn), Tel +86-20-85226630; Dr. Zhennan Gu, [zhennangu@jiangnan.edu.cn](mailto:zhennangu@jiangnan.edu.cn), Tel +86-0510-85197703.

## Supporting Information

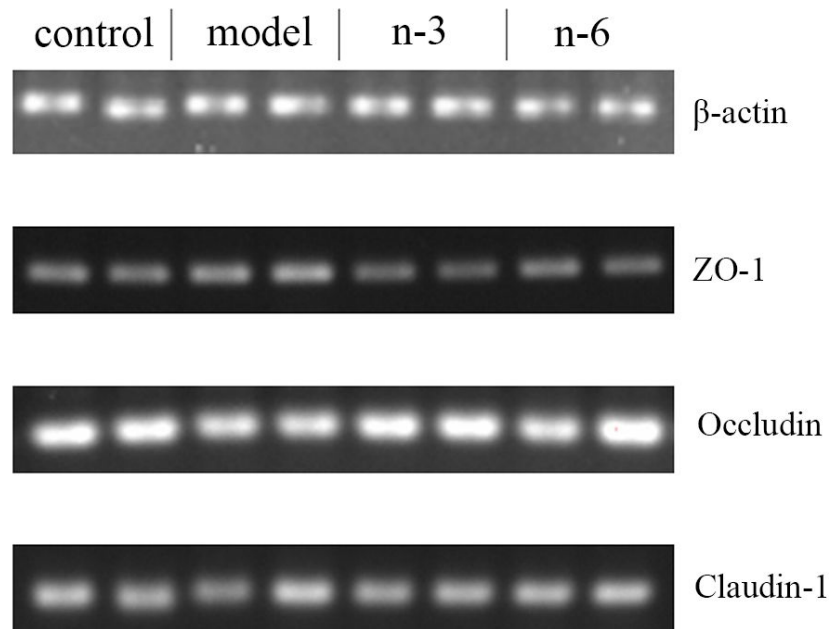

**Figure 1 Effects of n-3 and n-6 LCPUFAs on the expression of tight junction proteins.** Mice were pretreated with regular diet (control and model), n-3 LCPUFAs-enriched diet (n-3), and n-6 LCPUFAs-enriched diet (n-6) for 7 d. Mice from model, n-3, and n-6 groups were infected with *Salmonella*. When sacrificed at 2 d post-infection, mice colon was dissected, and the mRNA expression of tight junction proteins ( $\beta$ -actin, ZO-1, Occludin, and Claudin-1) were determined by PCR.

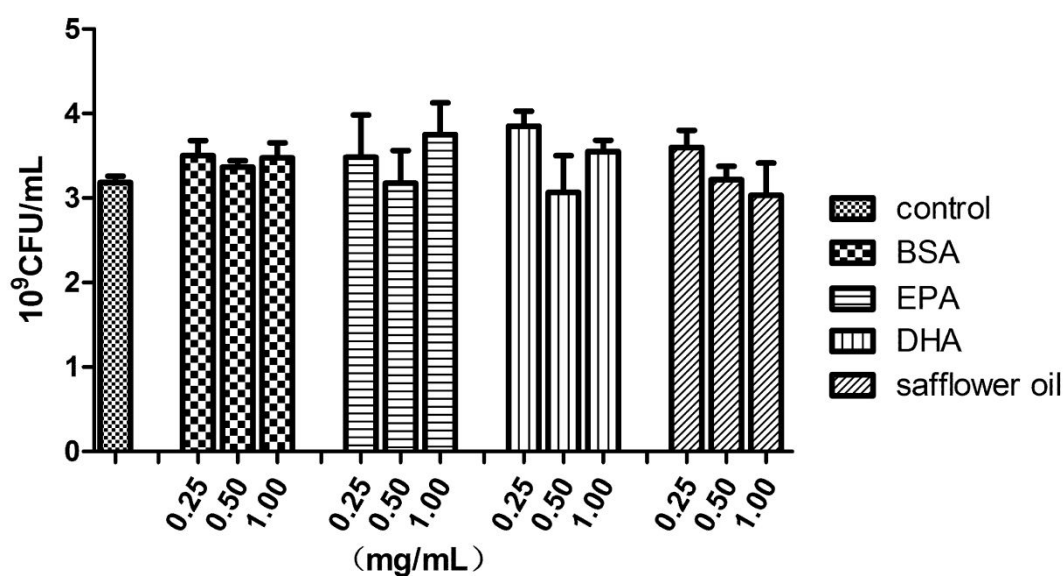

**Figure 2 LCPUFAs did not exert antibacterial effects against *Salmonella* growth.**

EPA, DHA, and safflower oil (LA) were added into culture media broth with final concentrations of 0.25 mg/ml, 0.50 mg/ml, and 1.00 mg/ml. *S. Typhimurium* SL1344 was inoculated in these media and incubated for 12 h. Control: LB broth; BSA: BSA-modified LB broth; EPA: BSA-modified LB broth with EPA supplement; DHA: BSA-modified LB broth with DHA supplement; safflower oil: BSA-modified LB broth with safflower oil supplement.

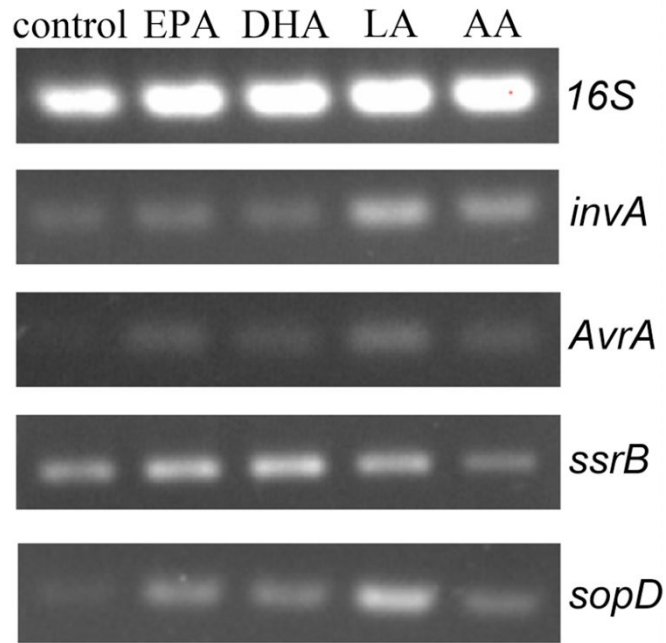

**Figure 3 LCPUFAs did not influence the gene expression of virulence effectors of *Salmonella*.** EPA, DHA, safflower oil (LA), and arachidonic acid (AA) were added to the culture medium of HT-29 cells, and cells were cultured in these modified media overnight. HT-29 cells were infected with *S. Typhimurium* SL1344 for 60 min. Then, the transcription of *invA*, *AvrA*, *ssrB*, and *sopD* was determined by PCR.

**Table 1 Fatty acid composition of different diets**

| <b>Fatty acids</b>      | <b>control</b> | <b>n-3</b>   | <b>n-6</b>   |
|-------------------------|----------------|--------------|--------------|
| <b>C14:0</b>            | 1.69 ± 0.09    | 1.08 ± 0.00  | 1.30 ± 0.11  |
| <b>C16:0</b>            | 18.15 ± 0.20   | 10.79 ± 0.07 | 14.80 ± 0.06 |
| <b>C16:1</b>            | 2.21 ± 0.16    | 1.37 ± 0.01  | 1.57 ± 0.30  |
| <b>C18:0</b>            | 4.11 ± 0.34    | 2.71 ± 0.04  | 4.42 ± 0.19  |
| <b>C18:1</b>            | 25.77 ± 0.08   | 16.42 ± 0.15 | 22.99 ± 0.25 |
| <b>C18:2 (LA, n-6)</b>  | 37.17 ± 0.24   | 22.81 ± 0.61 | 48.98 ± 0.86 |
| <b>C18:3</b>            | 2.93 ± 0.10    | 1.77 ± 0.07  | 2.59 ± 0.55  |
| <b>C21:4</b>            | ND             | 0.65 ± 0.03  | ND           |
| <b>C22:4</b>            | ND             | 1.88 ± 0.04  | ND           |
| <b>C21:4</b>            | ND             | 0.94 ± 0.01  | ND           |
| <b>C20:5 (EPA, n-3)</b> | 3.28 ± 0.18    | 18.27 ± 0.06 | 2.53 ± 0.22  |
| <b>C22:6 (DHA, n-3)</b> | 3.83 ± 0.30    | 21.33 ± 0.67 | 2.71 ± 0.11  |

ND: not detected.

**Table 2 Gene primers of mouse tight junction proteins and cytokines**

| <b>genes</b>                           | <b>Forward primer (3'-5')</b> | <b>Reverse primer (3'-5')</b>   |
|----------------------------------------|-------------------------------|---------------------------------|
| <i><b><math>\beta</math>-actin</b></i> | GGCTGTATTCCCCTCCATCG          | CCAGTTGGTAACAATGCCATGT          |
| <i><b>ZO-1</b></i>                     | TGAGTGAAGAACTGTCAGGCATTG      | CCCCATTTACTGGCTGGTATTTT         |
| <i><b>Claudin-1</b></i>                | TGAGTGGCTGTGCTGCTAACC         | TTGACAGATGGGAAAACGAGGTA         |
| <i><b>Occcludin</b></i>                | AGAGGATGGTGGGAGATTATGACA      | CAATACTGGAGATAGGAAACTGATGG<br>A |
| <i><b>TNF-<math>\alpha</math></b></i>  | AGGGTCTGGGCCATAGAACT          | CCACCACGCTCTTCTGTCTAC           |
| <i><b>IL-1<math>\beta</math></b></i>   | CTGAACTCAACTGTGAAATGC         | TGATGTGCTGCTGCGAGA              |
| <i><b>IL-6</b></i>                     | CTCTGCAAGAGACTTCCATCCAGT      | GAAGTAGGGAAGGCCGTGG             |
| <i><b>IL-10</b></i>                    | CCCTTGCTATGGTGTCTT            | TGGTTTCTCTCCCAAGACC             |
| <i><b>IFN-<math>\gamma</math></b></i>  | TTTGAGGTCAACAACCCACAGG        | ACAACCCCGCAATCACAGTCT           |

**Table 3 Gene primers of *Salmonella* virulence effectors**

| <b>genes</b>       | <b>Forward primer (3'-5')</b> | <b>Reverse primer (3'-5')</b>   |
|--------------------|-------------------------------|---------------------------------|
| <b><i>16S</i></b>  | CGATGTCTACTTGGAGGTTGTG        | CTCTGGAAAGTTCTGTGGATGTC         |
| <b><i>ssrB</i></b> | AACCTCATTCTTCGGGCACAG         | ACGAGCCTGACATACTTATCCTTGA       |
| <b><i>AvrA</i></b> | AAACACCGAAGCATTGACCTGT        | CCGATGTCTTTCCGTCCATAACT         |
| <b><i>invA</i></b> | GAAATGGCAGAACAGCGTCG          | CAACCAGATAGGTAGGTAATGGAATG<br>A |
| <b><i>sopD</i></b> | TCGAAGATGACCTGGCACCC          | TGAGTCGTAGGCTCAAAGTTACCG        |
